# Supplementary material for: FABP3 deficiency exacerbates metabolic derangement in cardiac hypertrophy via PPARα pathway
Source: Research Square preprint supplement (doi:10.21203/rs.3.rs-151701/v1), 2021-02-05
Supplement: Supplementary file 1 [file ac02f9daba2dfbc54a815917.pdf]

## **SUPPLEMENTAL MATERIALS**

**Supplementary Fig. 1-8**

**Supplementary Table. 1, 2**

## Supplementary Figures

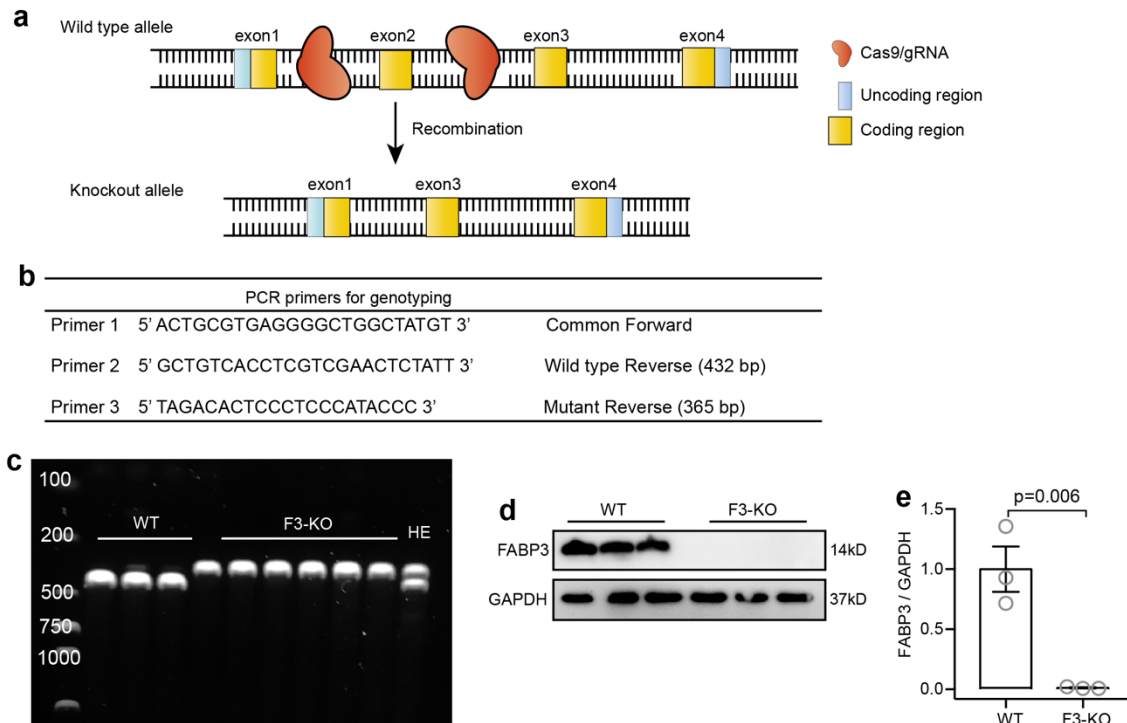

**Supplementary Fig. 1 Construction of *Fabp3*-knock-out mice with the CRISPR/Cas9 method.**

**a** Schematic diagram of *Fabp3*-KO strategy. **b** Sequences of primers used for genotyping. Primers 1 and 2 amplify a 432-bp fragment in the wild-type (WT) allele, while primers 1 and 3 amplify a 365-bp fragment in the homozygous mutant allele. **c** Representative PCR genotyping images including WT, homozygous (F3-KO), and heterozygous mice (HE) mice. **d** Representative western blot images showing FABP3 expression in *Fabp3* deletion hearts (F3-KO) and its WT alleles. **e** Quantification of (d). [e, n = 3, Student's *t*-test.]

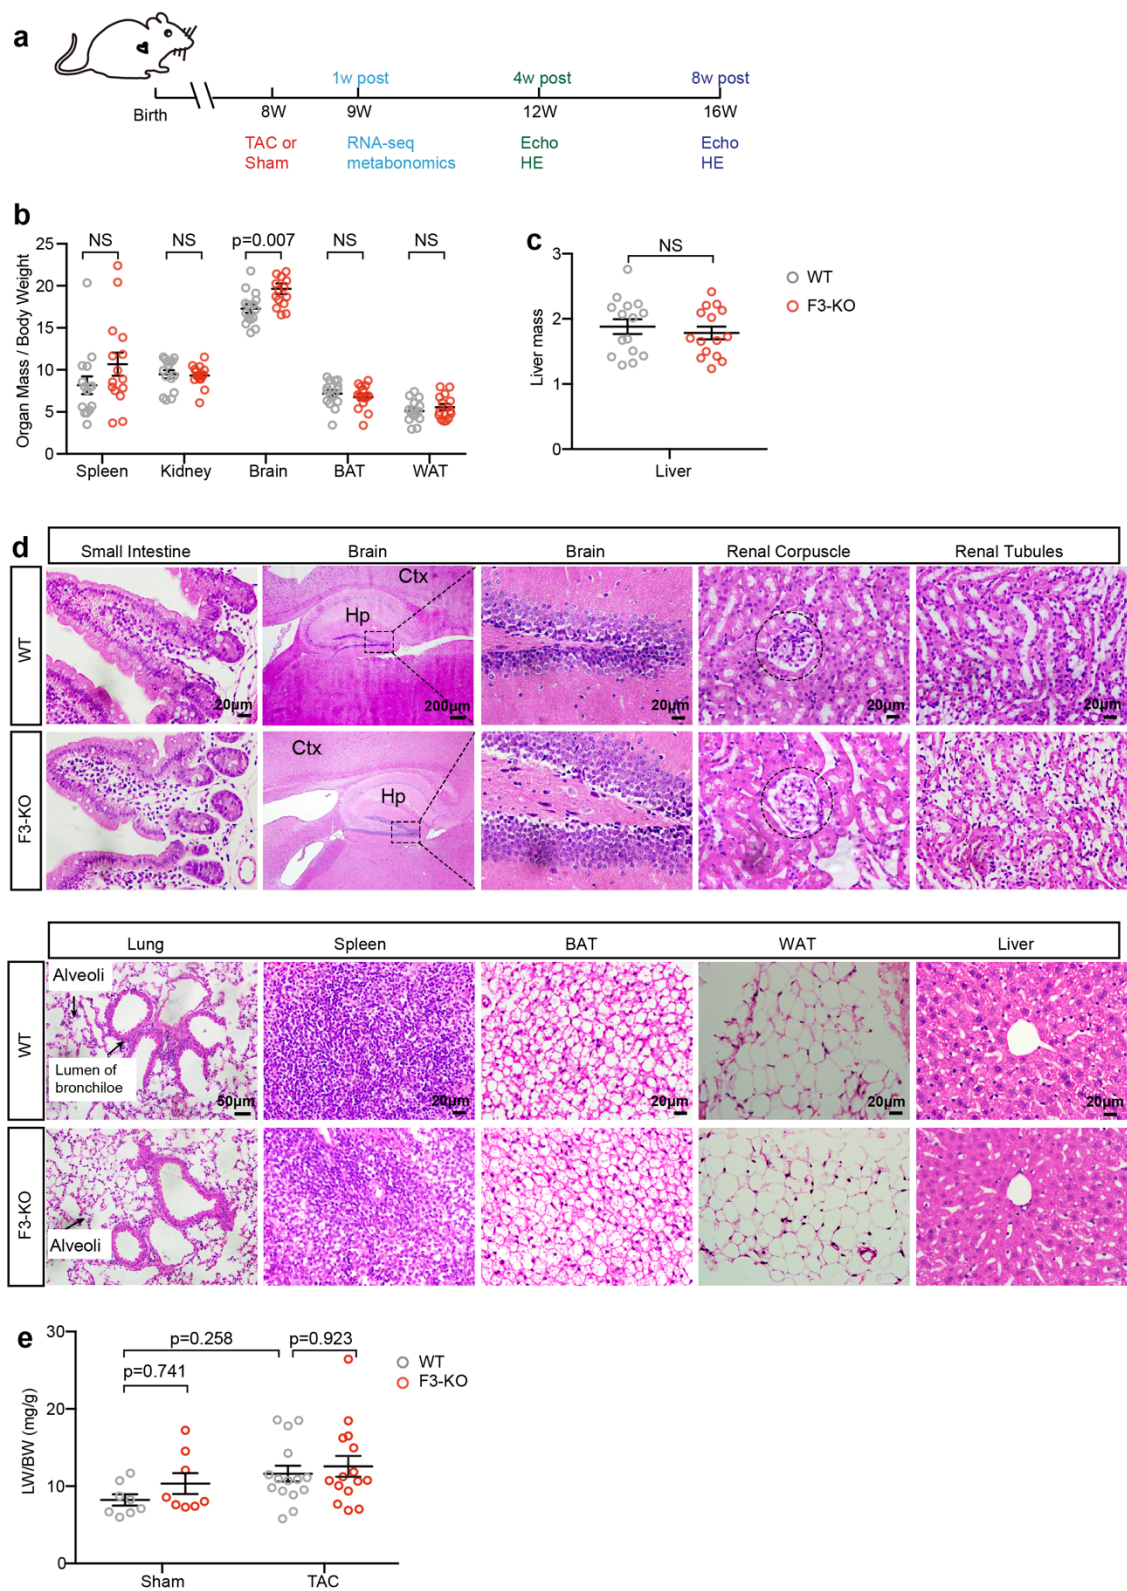

**Supplementary Fig. 2 FABP3 defect does not affect tissue mass or their morphology except for hearts. a** Experimental schematic diagram illustrating the strategy for multi-omics analysis,

echocardiography, and morphology analysis of WT and F3-KO mice after TAC or sham surgery. **b** The ratio of organ mass to body weight in WT and F3-KO mice at 4 weeks after TAC operations. **c** Liver mass in F3-KO mice and its WT littermates. **d** Representative H&E images of tissue organs, including the small intestine, brain, kidney, lung, brown adipose tissue (BAT), and white adipose tissue (WAT), from WT and F3-KO mice at 4 weeks after TAC operations. **e** The ratio of lung weight to body weight from sham- or TAC-operated WT and F3-KO mice. [**b**, **c**,  $n = 15$ , Student's *t*-test; **e**,  $n = 8, 8, 15, 15$ , respectively, Tukey post-hoc test.]



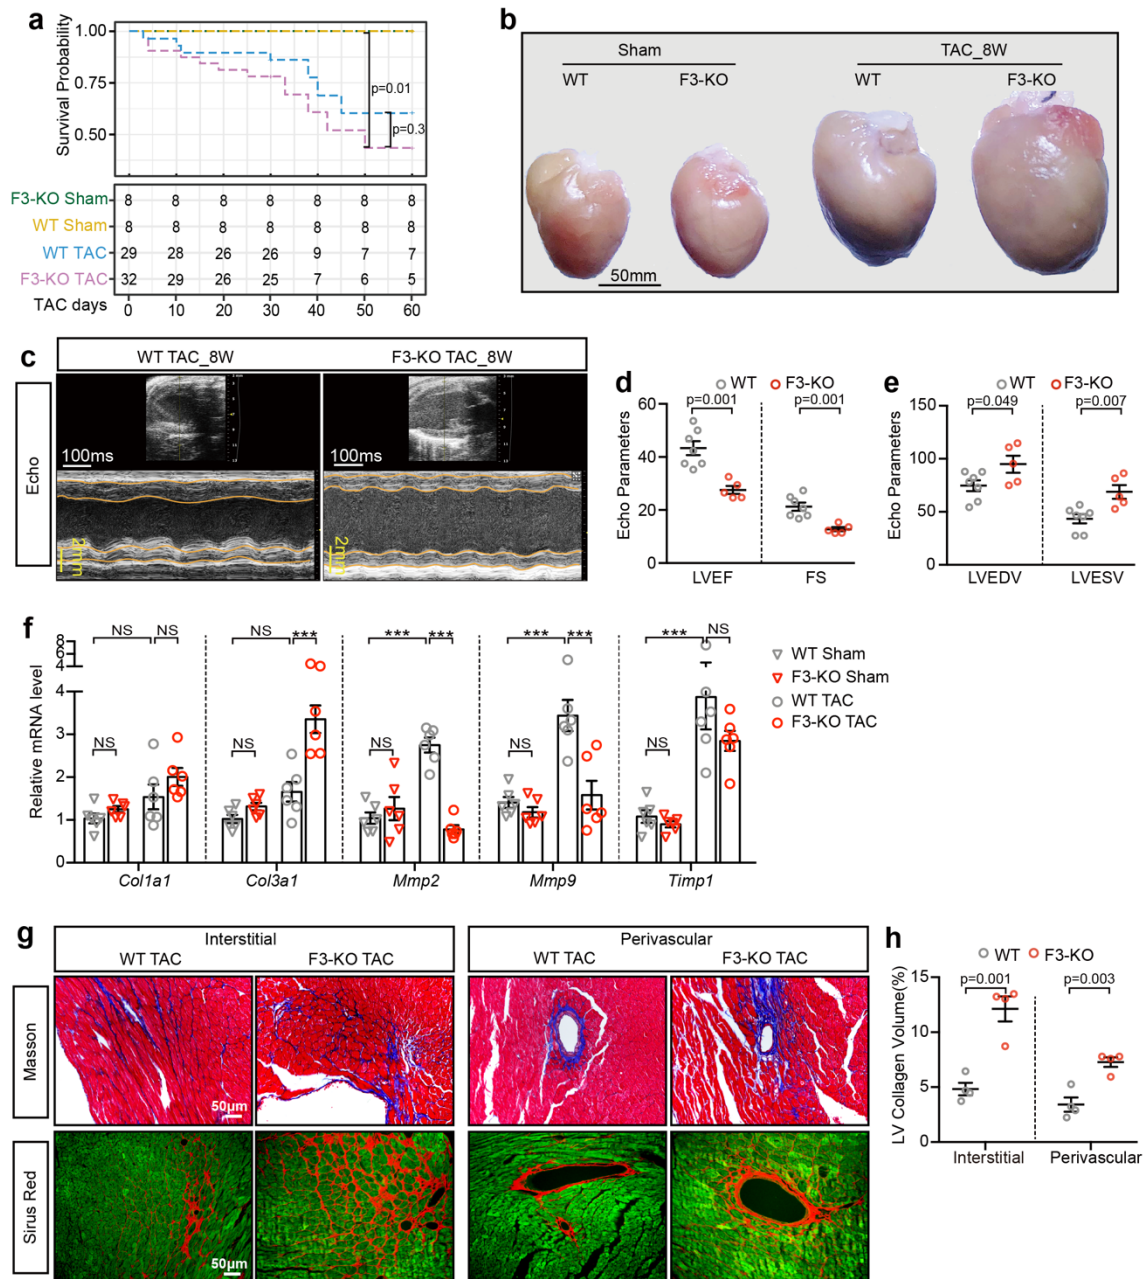

**Supplementary Fig. 3 FABP3-null exacerbates TAC-induced cardiac dysfunction and fibrosis.** **a** Survival probability of WT and F3-KO mice up to 8 weeks after TAC or sham surgery. **b** Gross heart morphology images in WT and F3-KO mice at 8 weeks after surgery. **c** Representative echo images of WT and F3-KO mice at 8 weeks after TAC operation. **d** Quantification of left ventricular ejection fraction (LVEF) and fractional shortening (FS) in panel

(c). **e** Quantification of left ventricular volume at diastole and systole (LVEDV, LVESV) in panel (c). **f** mRNA expression of fibrosis-related genes (*Coll1a1*, *Col3a1*, *Mmp2*, *Mmp9*, and *Timp1*) from WT and F3-KO hearts at sham or 8 weeks post-surgery. NS, not significant, \*\*\*  $p < 0.001$ . **g** Representative images of Masson (top) and Sirius Red staining (bottom) in interstitial and perivascular area of WT and F3-KO hearts. **h** Quantification results of collagen volume in panel (g). [**d**, **e**,  $n = 7, 5$ , respectively; **f**,  $n = 6$ , Tukey's post-hoc test; **h**,  $n = 4$ ; (**d**, **e**, and **h**): Student's *t*-test.]

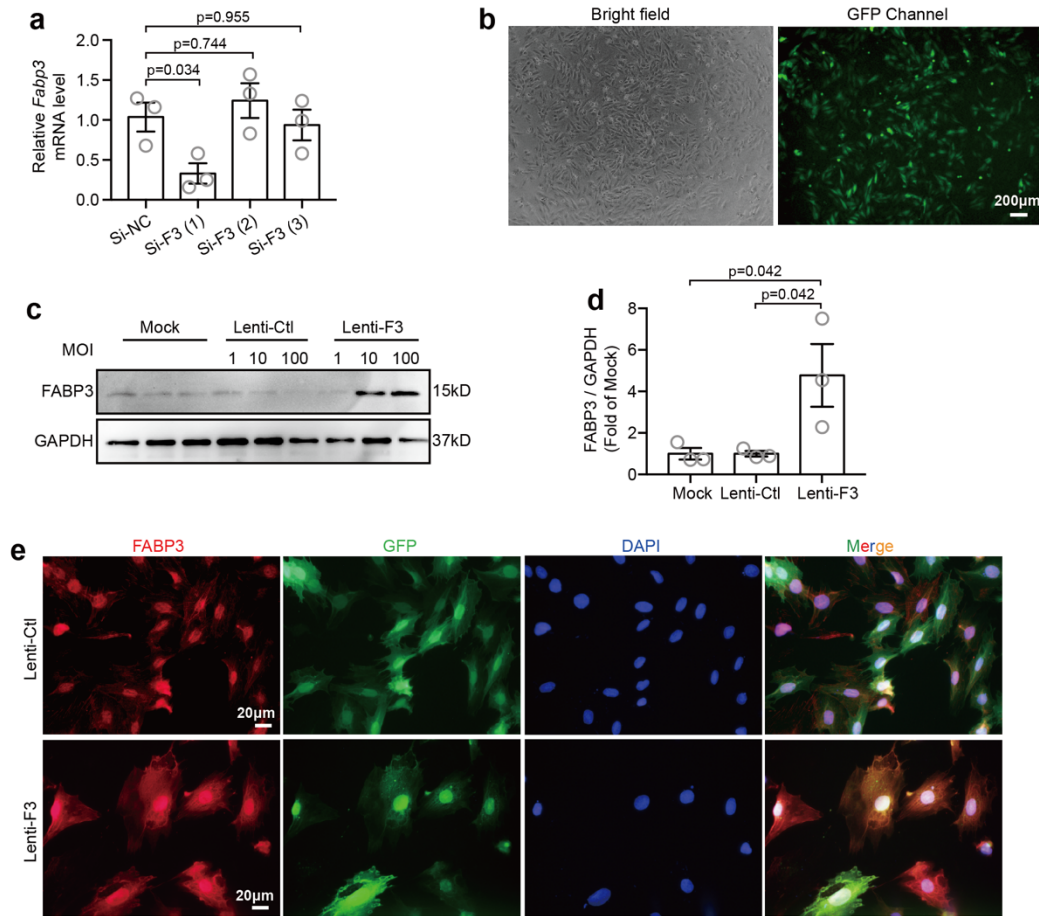

**Supplementary Fig. 4 Manipulating *Fabp3* expression with siRNA or lentivirus.** **a** H9C2 cells were transfected with si-RNA targeting *Fabp3* (Si-F3(1), Si-F3(2), Si-F3(3)) or its negative control (Si-NC), then total RNA was extracted for qPCR analysis to determine *Fabp3* mRNA expression. **b** H9C2 cells were transfected with lentivirus and visualized using a microscope to determine the transfection efficiency; (Left) bright field of cultured cells, (Right) GFP channel of the same field corresponding to the left. **c** H9C2 cells were transfected with *Fabp3*-lentivirus or its control virus (Lenti-Ctl) at different MOIs (1, 10, 100). The whole cell lysates were then analyzed with western blotting. **d** Quantification results of (c). **e** Immunofluorescence co-staining of FABP3 (red), GFP (green), and DAPI (blue) after Lenti-Ctl or Lenti-F3 transfection. [a, d, n = 3; (a, d): Dunnett's post-hoc test.]

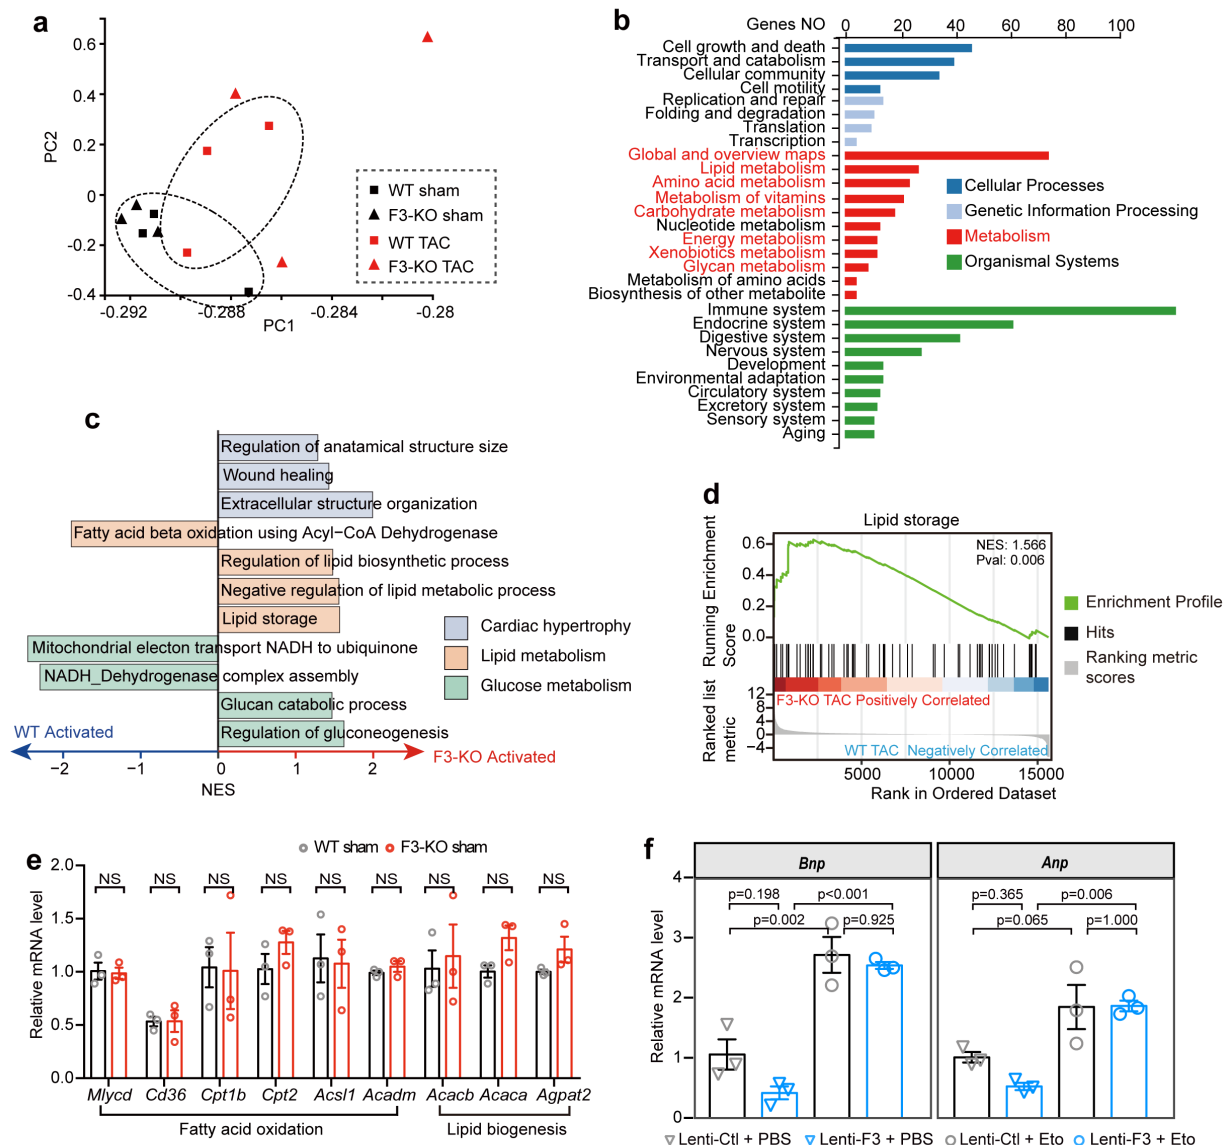

**Supplementary Fig. 5 FABP3-defect hearts exhibit deranged metabolic pathways.** **a** PCA plot comprising all samples in RNA-seq analysis (n = 3 biological replicates / per group). **b** KEGG functional enrichment results including four biological terms (cellular process, genetic information processing, metabolism, and organismal systems) between TAC-operated F3-KO and WT hearts. **c** GSEA analysis based on GO terms comparing differentially activated pathways between TAC-operated F3-KO and WT hearts. Results are displayed according to the normalized enrichment score (NES). Pathways with positive NES indicated more upregulated genes in F3-KO hearts. **d** GSEA plot showed that *Fabp3*-null hearts are positively correlated with lipid storage. **e** The mRNA expression of FAO and lipid biogenesis genes in WT and F3-KO hearts after sham operations was

determined by qPCR assay. NS, not significant. **f** NRVMs with knocking-in expression of *Fabp3* were treated with or without etomoxir (Eto), then the mRNA expression of *Bnp* and *Anp* was determine by qPCR assay. [**e**, n = 3, Student's *t*-test; **f**, n = 3, Tukey's post-hoc test.]

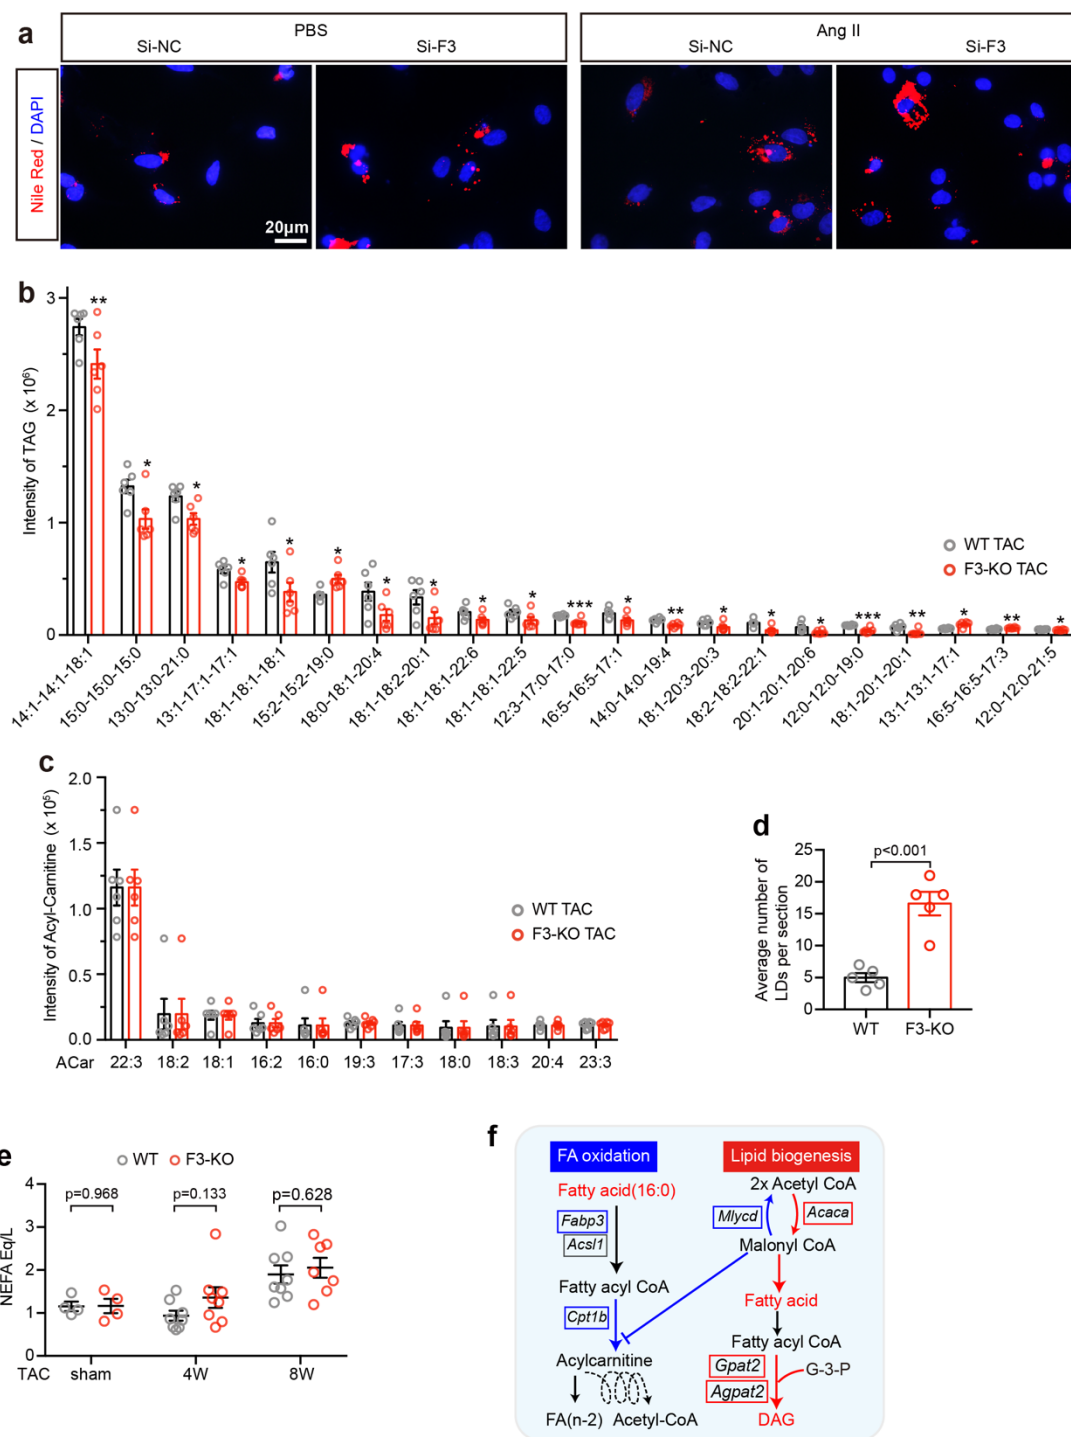

**Supplementary Fig. 6 FABP3-depletion leads to excessive cardiac lipid accumulation after TAC operation.** **a** NRVMs with knocking-down expression of *Fabp3* or its scrambled control were stained with Nile Red and DAPI (blue). **b** The level of triglyceride (TAG) in WT and F3-KO hearts was determined by LC-MS analysis, 6 biological replicates / per group. \*  $p < 0.05$ , \*\*  $p < 0.01$ .

0.01. **c** The level of Acyl-Carnitine (ACar) in WT and F3-KO hearts was determined by LC-MS analysis. **d** Quantification the number of lipid droplet in Fig. 4l. **e** Blood non-esterified fatty acid (NEFA) levels were measured in F3-KO and WT littermates at 0, 4, and 8 weeks after TAC operations. **f** Schematic diagram including FAO/lipid biogenesis genes and metabolites shows defective FAO and activated lipid biogenesis in F3-KO hearts. Red font and rectangles denote upregulated metabolites or genes, and blue represents those that are downregulated. [**d**,  $n = 5$ ; **e**,  $n = 4, 4, 8, 8, 8, 7$ , respectively; (**b**, **d** and **e**): Student's *t*-test.]



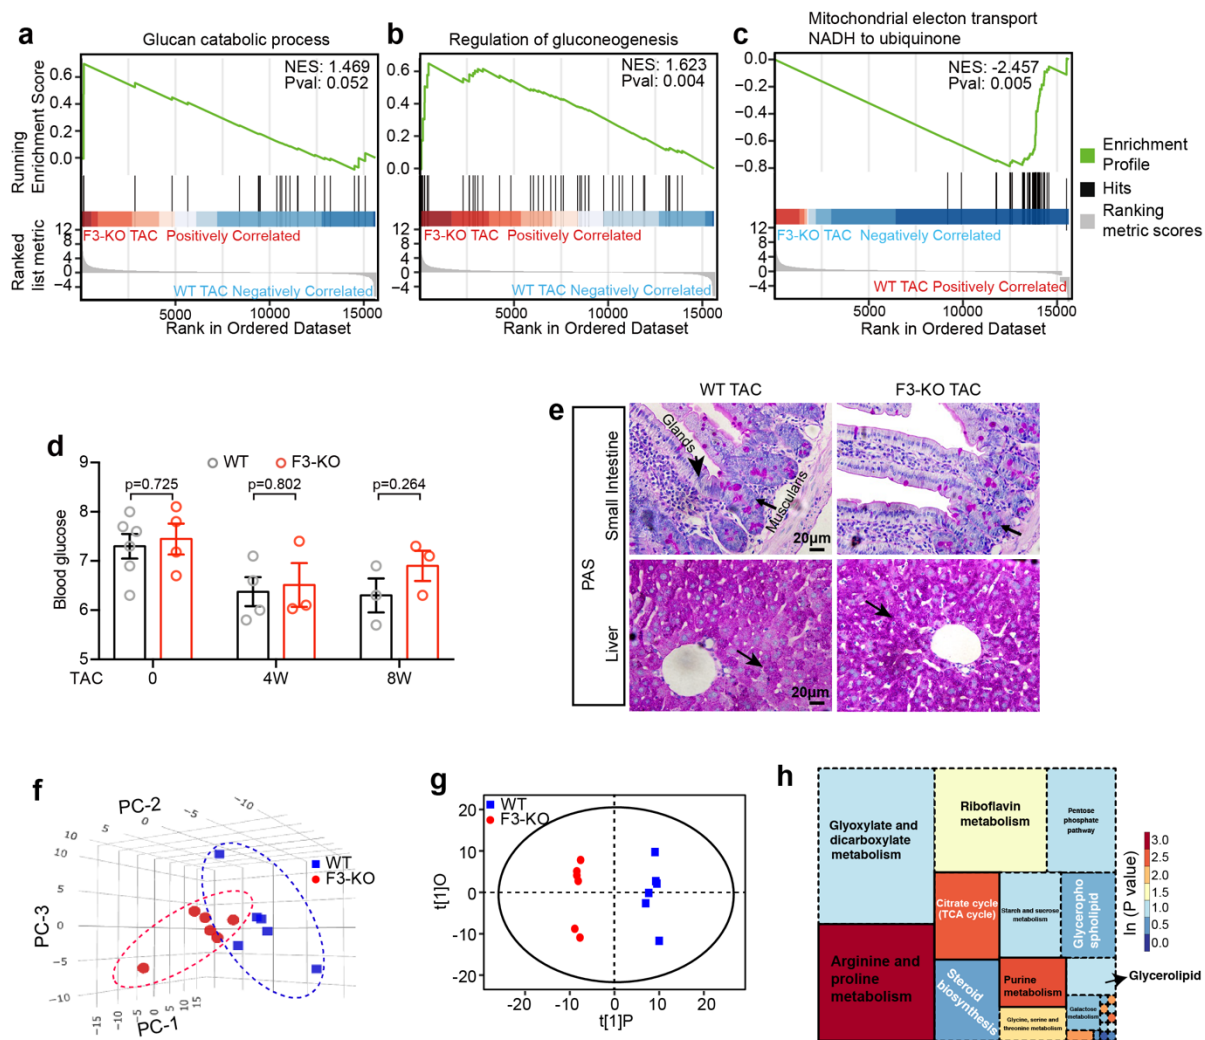

**Supplementary Fig. 7 FABP3-null hearts show increased glycolysis after TAC surgery.** **a-c** GSEA plot showed *Fabp3*-defect heart was positively correlated with “glucan catabolic process” (**a**), “Regulation of gluconeogenesis” (**b**), while was negatively correlated with “Mitochondrial electron transport NADH to ubiquinone” (**c**). **d** Blood glucose level was measured in F3-KO mice and WT littermates at 0-week, 4-weeks, and 8-weeks after TAC operation. **e** Periodic acid Schiff glycogen staining (PAS) of the small intestine and liver sections was performed on TAC-operated WT and F3-KO mice at 4 weeks post-surgery. (**f-h**) Non-targeted metabolomics analysis was performed on TAC-operated WT and F3-KO hearts. **f** PCA plot showing metabolic differences in the above groups,  $n = 6$  biological replicates /group. **g** Orthogonal partial least-squares

discrimination analysis (OPLS-DA) based on differential metabolomics. **h** KEGG pathway analysis of differential metabolites. [**d**, n = 6, 4, 4, 3, 3, 3, respectively, Student's *t*-test.]

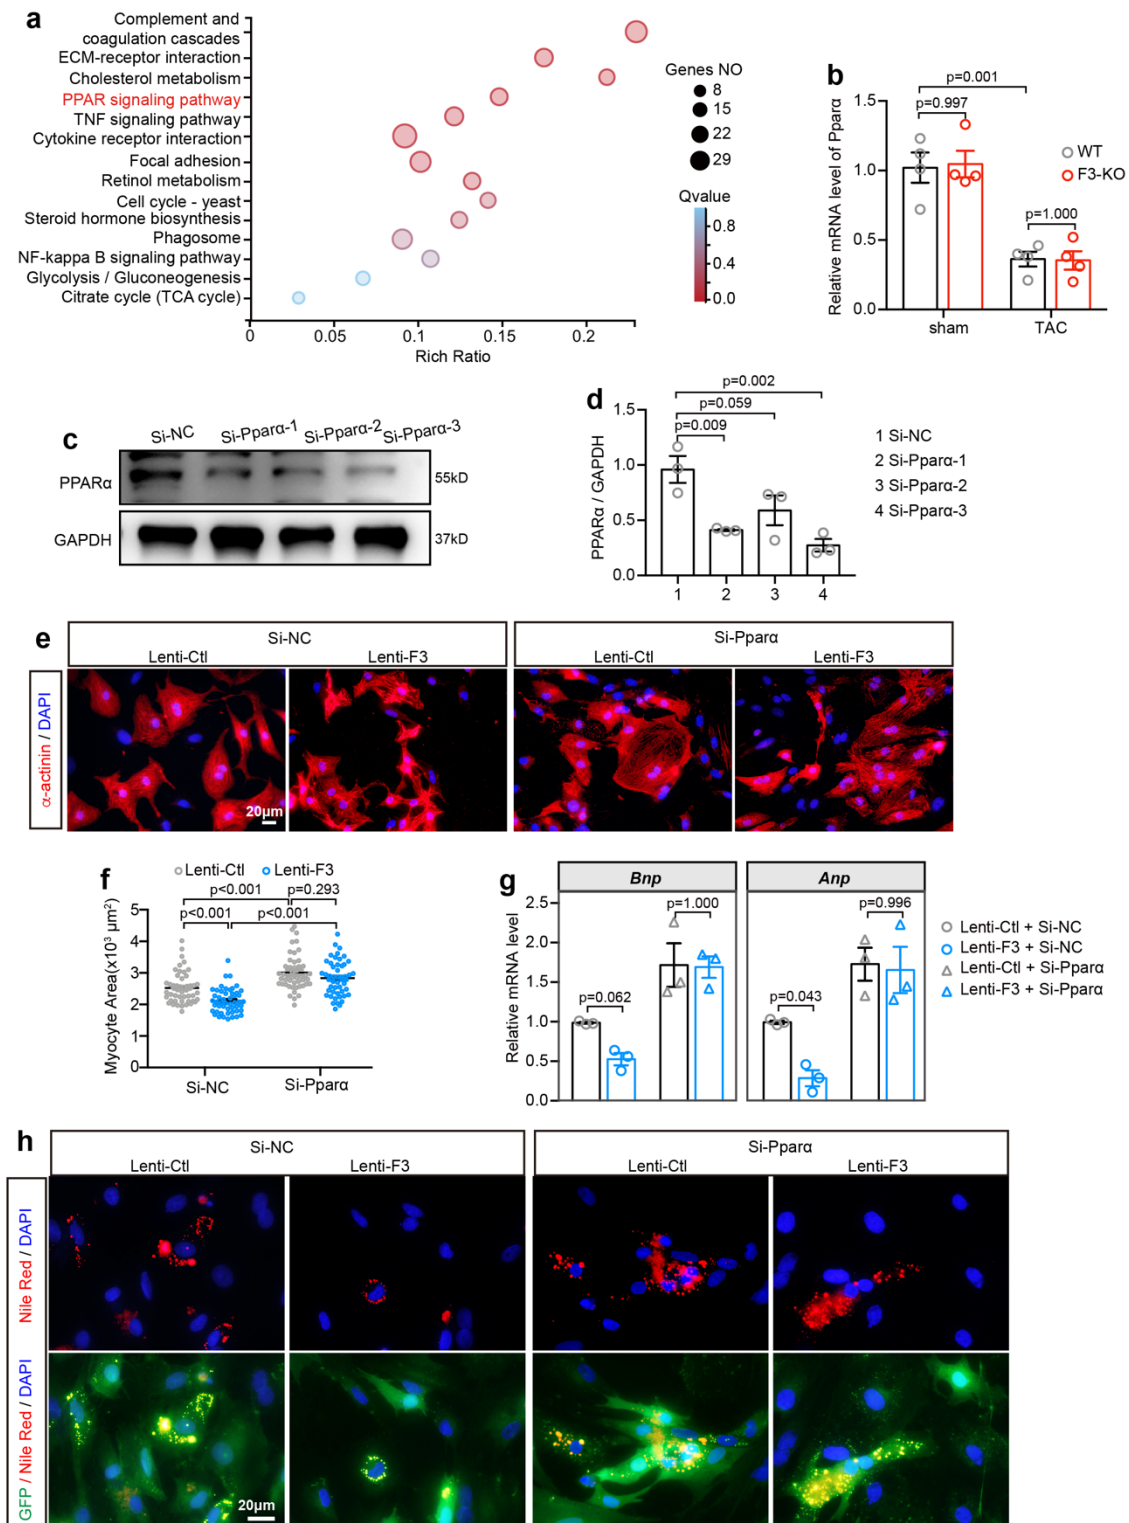

**Supplementary Fig. 8 Requirement of PPAR $\alpha$  in FABP3-driven metabolic regulation and cardiac hypertrophic response.** **a** KEGG analyses of top enriched pathways based on differentially expressed genes between TAC-operated WT and F3-KO hearts in RNA-seq analysis. **b** The mRNA expression of *Ppara* in WT and F3-KO hearts after sham- or TAC-operation. **c** NRVMs were transfected with siRNA targeting *Ppara* or its negative control and its protein expression was determined by western blot assay. **d** The quantification results in panel (c). **e** NRVMs with knocking-in expression of FABP3 were transfected with Si-Ppara or its negative control. After Ang II treatment, cell area was determined by  $\alpha$ -actinin staining. **f** The quantification results of cell area in (e), 50 cells /group were calculated. **g** The mRNA expression of *Bnp* and *Anp* was determined in the indicated groups by qPCR assay. **h** The level of neutral lipid was measured by Nile red staining in the aforementioned groups. [d, n = 3, Dunnett's post-hoc test; f, Tukey's post-hoc test; g, n = 3, Games-Howell post-hoc test.]

## **Supplementary Tables**

**Supplementary Table. 1 Expression of PPAR $\alpha$  target genes in RNA-seq**

**Supplementary Table. 2 Primer pairs used in the current study**

**Supplementary Table. 1 Expression of PPAR $\alpha$  target genes in RNA-seq**

| MUS ID          | Terms                             | log2(F3-KO<br>TAC vs WT<br>TAC) | Qvalue(F3-KO<br>TAC vs WT<br>TAC) | log2(F3-KO<br>sham vs WT<br>sham) | Qvalue(F3-KO<br>sham vs WT<br>sham) |
|-----------------|-----------------------------------|---------------------------------|-----------------------------------|-----------------------------------|-------------------------------------|
| <i>Gck</i>      | glycolysis                        | 1.694E+00                       | 2.000E-181                        | 1.201E+00                         | 4.060E-54                           |
| <i>Pklr</i>     | glycolysis                        | 3.834E+00                       | 1.774E-02                         | NA                                | NA                                  |
| <i>Pck1</i>     | glycolysis                        | 3.696E+00                       | 2.420E-08                         | -1.656E+00                        | 4.542E-01                           |
| <i>G6pc</i>     | glycolysis                        | 3.419E+00                       | 5.425E-02                         | NA                                | NA                                  |
| <i>Fbp1</i>     | glycolysis                        | 2.319E+00                       | 3.020E-04                         | -4.861E-01                        | 7.884E-01                           |
| <i>Pcx</i>      | glycolysis                        | -1.220E-01                      | 6.733E-02                         | -1.657E-02                        | 8.640E-01                           |
| <i>G6pc3</i>    | glycolysis                        | -9.954E-02                      | 6.387E-02                         | -9.750E-02                        | 9.396E-02                           |
| <i>Fbp2</i>     | glycolysis                        | -1.531E+00                      | 1.800E-84                         | -6.448E-01                        | 9.570E-20                           |
| <i>Pdk4</i>     | glycolysis                        | -1.856E+00                      | 0.000E+00                         | -4.201E-01                        | 2.250E-52                           |
| <i>Eno1</i>     | glycolysis                        | -1.871E-01                      | 1.010E-14                         | 1.613E-01                         | 3.140E-09                           |
| <i>Cpt1b</i>    | Mitochondrial $\beta$ -Oxidation  | -2.654E-01                      | 6.160E-100                        | 1.183E-01                         | 9.380E-21                           |
| <i>Mlycd</i>    | Mitochondrial $\beta$ -Oxidation  | -4.021E-01                      | 1.030E-31                         | 1.103E-02                         | 8.401E-01                           |
| <i>Acaa2</i>    | Mitochondrial $\beta$ -Oxidation  | -5.587E-01                      | 0.000E+00                         | 2.349E-01                         | 7.740E-85                           |
| <i>Acadl</i>    | Mitochondrial $\beta$ -Oxidation  | -2.831E-01                      | 4.260E-165                        | -1.081E-01                        | 4.980E-23                           |
| <i>Acadm</i>    | Mitochondrial $\beta$ -Oxidation  | -2.022E-01                      | 1.130E-82                         | 6.708E-02                         | 7.260E-11                           |
| <i>Acads</i>    | Mitochondrial $\beta$ -Oxidation  | -1.543E-01                      | 1.000E-07                         | 9.716E-02                         | 6.040E-04                           |
| <i>Acadvl</i>   | Mitochondrial $\beta$ -Oxidation  | -3.518E-01                      | 2.400E-211                        | 2.211E-01                         | 1.990E-98                           |
| <i>Cpt2</i>     | Mitochondrial $\beta$ -Oxidation  | -2.880E-01                      | 3.630E-33                         | 5.199E-02                         | 4.732E-02                           |
| <i>Crat</i>     | Mitochondrial $\beta$ -Oxidation  | -2.193E-01                      | 1.030E-53                         | 5.248E-02                         | 2.990E-04                           |
| <i>Ehhadh</i>   | Mitochondrial $\beta$ -Oxidation  | -2.113E-01                      | 1.672E-02                         | 1.330E-01                         | 2.390E-01                           |
| <i>Hadha</i>    | Mitochondrial $\beta$ -Oxidation  | -3.991E-01                      | 0.000E+00                         | 1.681E-01                         | 3.690E-102                          |
| <i>Hadhb</i>    | Mitochondrial $\beta$ -Oxidation  | -1.304E-01                      | 3.480E-54                         | 2.792E-01                         | 4.190E-295                          |
| <i>Slc25a20</i> | Mitochondrial $\beta$ -Oxidation  | -3.290E-01                      | 7.040E-37                         | 4.489E-01                         | 2.170E-76                           |
| <i>Aldh9a1</i>  | $\omega$ -Hydroxylation/Oxidation | -3.810E-01                      | 6.690E-14                         | 4.407E-02                         | 5.159E-01                           |
| <i>Cpt1a</i>    | Mitochondrial $\beta$ -Oxidation  | 2.983E-01                       | 2.310E-14                         | 4.334E-01                         | 2.800E-24                           |
| <i>Acaca</i>    | Lipogenesis                       | 3.354E-01                       | 5.150E-05                         | -6.874E-02                        | 5.780E-01                           |
| <i>Agpat2</i>   | Lipogenesis                       | 1.148E-01                       | 2.359E-02                         | 2.451E-01                         | 1.540E-06                           |
| <i>Elov16</i>   | Lipogenesis                       | 3.091E-01                       | 3.578E-01                         | 6.277E-01                         | 1.130E-01                           |
| <i>Fads1</i>    | Lipogenesis                       | 2.607E-01                       | 1.100E-05                         | -6.364E-02                        | 5.038E-01                           |
| <i>Fads2</i>    | Lipogenesis                       | 5.966E-01                       | 7.180E-08                         | 8.289E-02                         | 6.642E-01                           |

|                |                                          |            |            |            |           |
|----------------|------------------------------------------|------------|------------|------------|-----------|
| <i>Fasn</i>    | Lipogenesis                              | 3.305E-01  | 1.640E-06  | -6.352E-02 | 5.088E-01 |
| <i>Gpm</i>     | Lipogenesis                              | 3.065E-01  | 5.230E-39  | 1.468E-01  | 5.160E-09 |
| <i>Scd1</i>    | Lipogenesis                              | 3.667E-01  | 1.920E-06  | -3.301E-01 | 1.905E-03 |
| <i>Scd2</i>    | Lipogenesis                              | 3.173E-01  | 7.250E-06  | -8.918E-02 | 3.801E-01 |
| <i>Acacb</i>   | Lipogenesis                              | -1.605E-01 | 6.250E-19  | 8.186E-02  | 6.280E-06 |
| <i>Apoa1</i>   | Lipid Binding & Transport / Lipoproteins | 5.076E+00  | 3.440E-50  | NA         | NA        |
| <i>Apoa2</i>   | Lipid Binding & Transport / Lipoproteins | 3.238E+00  | 4.910E-39  | 7.292E-01  | 1.633E-01 |
| <i>Apoa5</i>   | Lipid Binding & Transport / Lipoproteins | 5.589E+00  | 7.080E-07  | NA         | NA        |
| <i>Apoc3</i>   | Lipid Binding & Transport / Lipoproteins | 5.921E+00  | 2.080E-08  | NA         | NA        |
| <i>Lipc</i>    | Lipid Binding & Transport / Lipoproteins | 5.709E-01  | 5.528E-01  | -7.110E-02 | 9.869E-01 |
| <i>Lpl</i>     | Lipid Binding & Transport / Lipoproteins | -9.695E-02 | 2.320E-132 | -2.253E-01 | 0.000E+00 |
| <i>Pltp</i>    | Lipid Binding & Transport / Lipoproteins | 3.134E-01  | 1.670E-11  | -6.226E-02 | 3.442E-01 |
| <i>Slc27a1</i> | Lipid Binding & Transport / Lipoproteins | -9.675E-01 | 4.640E-264 | -4.333E-01 | 8.650E-72 |
| <i>Slc27a2</i> | Lipid Binding & Transport / Lipoproteins | 2.082E+00  | 1.330E-07  | -6.878E-01 | 4.459E-01 |
| <i>Slc27a4</i> | Lipid Binding & Transport / Lipoproteins | -1.165E-02 | 9.063E-01  | -1.734E-01 | 2.560E-02 |
| <i>Vldlr</i>   | Lipid Binding & Transport / Lipoproteins | 1.692E-01  | 1.920E-23  | 6.631E-02  | 4.440E-04 |
| <i>Hmgcs2</i>  | Ketogenesis                              | -6.357E-01 | 3.470E-24  | -6.318E-01 | 3.350E-16 |
| <i>Abca1</i>   | Cholesterol Metabolism                   | 6.041E-01  | 3.630E-40  | -6.307E-02 | 3.825E-01 |
| <i>Abca4</i>   | Cholesterol Metabolism                   | -2.034E+00 | 3.870E-29  | 2.817E-01  | 9.389E-02 |
| <i>Cyp7a1</i>  | Cholesterol Metabolism                   | 2.834E+00  | 3.998E-02  | -2.067E+00 | 2.870E-01 |
| <i>Cyp8b1</i>  | Cholesterol Metabolism                   | 1.156E+00  | 1.737E-02  | -6.561E-01 | 5.556E-01 |
| <i>Nr1h2</i>   | Cholesterol Metabolism                   | -9.100E-02 | 6.145E-02  | -8.460E-02 | 1.108E-01 |
| <i>Nr1h3</i>   | Cholesterol Metabolism                   | -8.302E-02 | 4.458E-01  | -6.667E-01 | 1.460E-14 |
| <i>Fgf12</i>   | growth factor activity                   | 1.303E+00  | 7.757E-02  | 3.888E-01  | 6.388E-01 |
| <i>Acaa1a</i>  | Peroxisomal $\beta$ -Oxidation           | -1.459E-01 | 4.556E-03  | -9.915E-03 | 9.047E-01 |
| <i>Acaa1b</i>  | Peroxisomal $\beta$ -Oxidation           | 4.564E+00  | 2.370E-11  | NA         | NA        |
| <i>Acox1</i>   | Peroxisomal $\beta$ -Oxidation           | -7.232E-02 | 3.100E-05  | -8.613E-02 | 5.550E-07 |
| <i>Ech1</i>    | Peroxisomal $\beta$ -Oxidation           | -5.972E-01 | 0.000E+00  | -7.171E-02 | 5.500E-14 |



**Supplementary Table. 2 Primer pairs used in the current study**

| Primers for mouse qPCR |                          |                            |
|------------------------|--------------------------|----------------------------|
| Gene                   | Forward primers (5'- 3') | Reverse primers (5'- 3')   |
| <i>Fabp3</i>           | AGCCTGGACCCAGTTCCTAC     | GGTGGCCTTGGTTCTGCTTTAT     |
| <i>Anp</i>             | GGGTAGGATTGACAGGATTGG    | CTCCTTGGCTGTTATCTTCGG      |
| <i>Bnp</i>             | TGGGAGGTCACTCCTATCCT     | GGCCATTTCCTCCGACTTT        |
| <i>Acta1</i>           | CCAAAGCTAACCGGGAGAAG     | GACAGCACCGCCTGGATAG        |
| <i>Myh7</i>            | CGGACCTTGGAAGACCAGAT     | GACAGCTCCCCATTCTCTGT       |
| <i>Colla1</i>          | CATAAAGGGTCATCGTGGCT     | TTGAGTCCGTCTTTGCCAG        |
| <i>Col3a1</i>          | ACGTAGATGAATTGGGATGCAG   | GGGTTGGGGCAGTCTAGTG        |
| <i>Mmp2</i>            | ACCAAGAACTTCCGATTATCCC   | CAGTACCAGTGTCAGTATCAGC     |
| <i>Mmp9</i>            | TCCCCAAAGACCTGAAAACC     | CTGCTTCTCTCCCATCATCTG      |
| <i>Timp1</i>           | CTCAAAGACCTATAGTGCTGGC   | CAAAGTGACGGCTCTGGTAG       |
| <i>Gapdh</i>           | GCCTTCCGTGTTCTACC        | CCTCAGTGTAGCCCAAGATG       |
| <i>Mlycd</i>           | CGCCTATCCCTGGATTCACC     | ATCCCTGAGGTGCCAAACAC       |
| <i>Cd36</i>            | ATTCCCTTGGCAACCAACCA     | TACGTGGCCCGGTTCTACTA       |
| <i>Cpt1b</i>           | GCACACCAGGCAGTAGCTTT     | CAGGAGTTGATTCCAGACAGGTA    |
| <i>Cpt2</i>            | TGATGGCTGAGTGCTCCAAA     | GAACACCAATGTTTCATGAGGAAGAA |
| <i>Acs11</i>           | CGGCCGCGACTCCTTAAATA     | ATAGGGCTGGTTTGGCTTCC       |
| <i>Acadm</i>           | GCGGCCATTAAGACCAAAGC     | GAAGACAGGTTCTCCGCCA        |
| <i>Acaca</i>           | ATGCACAGGACTGAGAAGGC     | GTGATAAGGTGGTGGCAGGG       |
| <i>Acacb</i>           | TCCAAGTGGCCCTAGTGAGT     | CGGATCCAGAGTGTTTCGAGG      |

|               |                         |                        |
|---------------|-------------------------|------------------------|
| <i>Agpat2</i> | CAGCCAGGTTCTACGCCAAG    | TGATGCTCATGTTATCCACGGT |
| <i>Gck</i>    | TAGCGGGGGTCATAAATCGC    | GCAGCCCTTACTCTTCTGGG   |
| <i>Pck1</i>   | TTGAACTGACAGACTCGCCC    | GGCACTTGATGAACTCCCCA   |
| <i>Slc2a1</i> | GCTTGTAGAGTGACGATCTGAGC | AAGCCAAACACCTGGGCAAT   |
| <i>Slc2a4</i> | GCTCTGACGATGGGGAACC     | CACCGAGACCAACGTGAAGA   |
| <i>Ppara</i>  | ACACGCGTGCGAGTTTTCA     | TCGCCGAAAGAAGCCCTTAC   |
| <i>18S</i>    | GTAACCCGTTGAACCCCAT     | CCATCCAATCGGTAGTAGCG   |

#### Primers for Rat qPCR

| Gene         | Forward primers (5' - 3') | Reverse primers (5' - 3') |
|--------------|---------------------------|---------------------------|
| <i>Fabp3</i> | ATGAAGTCACTCGGTGTGGG      | TCCCACTTCTGCACATGGAC      |
| <i>Anp</i>   | GAAGATGCCGGTAGAAGATGAG    | AGAGCCCTCAGTTTGCTTTTC     |
| <i>Bnp</i>   | GGTGCTGCCCCAGATGATT       | CTGGAGACTGGCTAGGACTTC     |
| <i>Myh7</i>  | GCCCCAAATGCAGCCAT         | CGCTCAGTCATGGCGGAT        |
| <i>Gapdh</i> | TGACAACTCCCTCAAGATTGTCA   | GGCATGGACTGTGGTCATGA      |
